# Supplementary material
Source: publisher figshare collection journal article supplement (https://gsapubs.figshare.com/articles/dataset/_/13046525)
Supplement: Supplementary file 1 [file 1]

## Sheet: Supplemental Table 1
Sample name	Latitude (decimal degrees N)	Longitude (decimal degrees E)	Elevation (m asl)	Elevation (m above modern ice)	Lithology	Sample type	Sample thickness (cm)	Bulk density (g cm3)	Shielding factor	Sample weight (g)	Be10/Be9 (mean)	Be10/Be9 (% error)	Be10 conc. (mean; atoms g)	Be10 conc. (1 sigma; atoms g)	Exposure age (mean; yrs)	Measurement uncertainty (1 sig.; yrs)	Total uncertainty (1 sig.; yrs)	Scaling model
Bruce Point transect
BP-16-11	-76.1424	162.398	267.606	237.931	Granite	Cobble	3.77778	2.65	0.998508	43.5719	1.44014e-13	8.68475	53626.5	4883.06	8120	780	1000	LSDn
BP-16-13	-76.1425	162.398	266.415	236.74	Granite	Boulder	2.45	2.65	0.999061	51.1881	1.23012e-13	6.07287	43939.2	2835.55	6630	460	690	LSDn
BP-16-12	-76.1425	162.398	265.869	236.194	Granite	Cobble	4	2.65	0.998647	48.2992	1.43395e-13	6.02627	42021.2	2824.27	6430	460	680	LSDn
BP-16-14	-76.1431	162.397	249.233	219.558	Granodiorite	Cobble	4.375	2.65	0.995746	29.5976	7.33394e-14	8.24032	43911.6	4000.6	6870	650	820	LSDn
BP-16-15	-76.1434	162.397	246.434	216.759	Granite	Cobble	4	2.65	0.998984	41.7839	1.34408e-13	7.50306	43971	3667.41	6860	540	760	LSDn
BP-16-16	-76.1438	162.398	238.363	208.688	Granodiorite	Cobble	7	2.65	0.999652	24.2985	4.9182e-14	10.7456	34481.7	4292.29	5560	630	750	LSDn
BP-16-17	-76.1446	162.398	220.495	190.82	Granite	Cobble	5.58333	2.65	0.998524	40.1437	1.3476e-13	5.73555	46216.9	3012.72	7470	450	660	LSDn
BP-16-18	-76.1447	162.398	216.077	186.402	Granodiorite	Cobble	4.625	2.65	0.99251	30.0655	6.2048e-14	8.22459	36112.1	3363.06	5880	540	700	LSDn
BP-16-19	-76.1452	162.398	202.298	172.623	Sandstone	Cobble	3.74	2.65	0.993273	69.0716	1.71864e-13	8.60978	38456.8	3525.97	6290	570	760	LSDn
BP-16-20	-76.1452	162.4	198.964	169.289	Granodiorite	Cobble	4.1	2.65	0.997447	17.3764	3.88726e-14	11.1072	36913.8	4983.41	6060	790	920	LSDn
BP-16-22	-76.1455	162.399	180.921	157.246	Sandstone	Cobble	4.3	2.65	0.937426	53.9039	1.28625e-13	8.97299	38513.3	3646.21	6850	600	810	LSDn
BP-16-21	-76.1456	162.4	179.467	149.792	Granodiorite	Boulder	5.01429	2.65	0.955138	31.9718	6.31106e-14	8.85109	34558.7	3439.26	6080	630	810	LSDn
BP-16-23	-76.1456	162.401	165.731	142.056	Granite	Cobble	6.1	2.65	0.916267	38.4057	1.14747e-13	9.96946	40115.7	4470.39	7490	760	950	LSDn
BP-16-24	-76.1454	162.403	160.813	137.138	Sandstone	Cobble	4.2	2.65	0.937426	61.8688	1.63309e-13	7.06361	36417.2	2801.25	6610	470	720	LSDn
BP-16-25	-76.1451	162.407	149.936	126.261	Granite	Cobble	6.58333	2.65	0.97591	45.8635	1.45703e-13	13.7944	51600	7415.8	9230	1280	1470	LSDn
BP-16-10	-76.1454	162.405	139.645	115.97	Granodiorite	Boulder	3.8875	2.65	0.976199	43.5744	8.13261e-14	7.05181	33267.5	2581.51	5910	430	620	LSDn
BP-16-09	-76.1457	162.405	122.596	98.921	Granite	Cobble	4	2.65	0.973411	44.246	2.22176e-13	7.18346	82573.5	6113.57	14960	1110	1620	LSDn
BP-16-08	-76.1458	162.405	119.038	95.363	Granite	Cobble	4.5	2.65	0.97353	41.4976	1.11455e-13	8.89654	35743.7	3599.11	6520	710	860	LSDn
BP-16-07	-76.1461	162.404	100.752	77.077	Granite	Cobble	5.58333	2.65	0.958544	43.2091	1.25574e-13	6.48084	39292	2899.92	7460	480	720	LSDn
BP-16-05	-76.1469	162.401	80.187	50.512	Granodiorite	Cobble	4.75	2.65	0.989244	52.3017	1.18647e-13	13.8931	36175.3	5294.34	6770	1010	1120	LSDn
BP-16-06	-76.1469	162.402	78.668	48.993	Granodiorite	Boulder	3.02727	2.65	0.982637	33.3081	8.50798e-14	10.3469	45759.3	5111.07	8450	940	1150	LSDn
BP-16-03	-76.1471	162.402	63.212	33.537	Granite	Cobble	4.33333	2.65	0.938222	64.7087	1.35e-13	7.14857	33754.1	2552.78	6760	470	700	LSDn
BP-16-04	-76.1472	162.402	59.542	29.867	Granite	Cobble	4.025	2.65	0.979309	28.2183	7.65001e-14	10.2722	34801.4	4303.64	6680	850	990	LSDn
BP-16-02	-76.1474	162.401	47.578	17.903	Granodiorite	Cobble	4.3125	2.65	0.979931	21.0063	3.40514e-14	12.7777	26076.3	4142.33	5080	830	940	LSDn
BP-16-01	-76.1475	162.402	42.463	12.788	Granite	Cobble	6.7	2.65	0.983528	50.755	1.03416e-13	9.12787	27035.6	2821.43	5390	550	710	LSDn
Mount Murray transect
MM-16-06	-76.1469	162.402	266.64	151.64	Granite	Cobble	4.9	2.65	0.999026	28.8195	6.14553e-14	3.13003	36988.3	1220.43	5710	180	490	LSDn
MM-16-07	-76.1839	162.014	266.54	151.54	Granodiorite	Cobble	6.6	2.65	0.99992	12.8901	2.74153e-14	4.33944	33539.6	1661.37	5250	260	450	LSDn
MM-16-08	-76.1839	162.014	266.54	151.54	Granite	Cobble	5.9	2.65	0.99992	6.5349	1.67128e-14	5.23293	39908.3	2588.82	6210	360	620	LSDn
MM-16-05	-76.184	162.017	258.12	143.12	Granite	Cobble	7.4	2.65	0.998032	5.8346	1.43511e-14	5.66964	37476.7	2728.94	5960	400	580	LSDn
MM-16-04	-76.1843	162.02	243.43	128.43	Granite	Cobble	1.5	2.65	0.999448	10.1639	2.32558e-14	4.58582	37119.3	1979.19	5690	310	560	LSDn
MM-16-02	-76.1834	162.027	214.43	99.43	Granite	Cobble	2.1	2.65	0.99939	45.4975	7.92949e-13	2.44594	294929	7355.41	47160	1190	3860	LSDn
MM-16-03	-76.1834	162.027	214.43	99.43	Granite	Cobble	4.7	2.65	0.99939	1.6907	4.76149e-15	14.2885	26474.8	8066.58	4270	1330	1370	LSDn
MM-16-01	-76.1835	162.029	210.74	95.74	Granodiorite	Cobble	1.9	2.65	0.99977	36.7708	8.36612e-14	8.38549	33604.2	3385.7	5340	590	700	LSDn
MM-16-29	-76.1901	161.942	298.02	55.02	Granite	Cobble	7.2	2.65	0.998845	51.8779	1.18596e-13	8.21772	35614.2	3297.32	5440	510	650	LSDn
MM-16-30	-76.1901	161.943	297.35	54.35	Granite	Cobble	3.9	2.65	0.999691	14.8924	2.88366e-13	1.98131	346814	6937.55	51930	1060	4220	LSDn
MM-16-28	-76.1912	161.943	276.63	33.63	Granite	Cobble	4.3	2.65	0.99185	17.5619	2.04262e-13	2.42066	206558	5067.92	31760	780	2610	LSDn
MM-16-27	-76.1912	161.943	276	33	Granodiorite	Cobble	6.7	2.65	0.998413	46.9949	6.54056e-13	1.39479	250215	3521.22	39110	570	3160	LSDn
MM-16-16	-76.1911	161.956	230.2	30.2	Granite	Cobble	4.4	2.65	0.996971	24.8787	3.36114e-13	3.99902	223897	9363.52	35920	1540	3190	LSDn
MM-16-26	-76.1916	161.942	271	28	Granite	Cobble	7.5	2.65	0.998413	5.8945	1.48957e-14	7.60777	34301.8	4143.77	5400	630	780	LSDn
MM-16-15	-76.1913	161.956	222.53	22.53	Granite	Cobble	7.9	2.65	0.993144	25.1328	2.11062e-13	2.89751	149690	4390.76	24950	750	2070	LSDn
MM-16-24	-76.192	161.941	264	21	Granite	Cobble	2.2	2.65	0.997426	30.0417	5.29682e-13	1.70269	314949	5418.58	48100	840	3910	LSDn
MM-16-09	-76.1912	161.954	218	18	Granodiorite	Cobble	7.1	2.65	0.996361	34.2475	4.01977e-14	4.52591	19235.5	1034.92	3120	200	290	LSDn
MM-16-12	-76.1916	161.955	212.5	12.5	Granite	Cobble	5.9	2.65	0.993371	26.5106	3.7505e-14	15.474	16950.4	3959.54	2740	620	650	LSDn
MM-16-23	-76.1923	161.941	249.42	6.42	Granite	Cobble	6.9	2.65	0.991962	36.0626	3.55113e-14	4.19511	16648.8	764.696	2620	140	220	LSDn
MM-16-10	-76.1918	161.954	203	3	Granite	Cobble	4.4	2.65	0.986298	2.3958	2.45594e-15	16.6871	Too low	Too low	ꟷ	ꟷ	ꟷ	ꟷ
MM-16-17	-76.1933	161.935	244	1	Granite	Cobble	3.5	2.65	0.988659	3.7193	2.37308e-15	17.98	Too low	Too low	ꟷ	ꟷ	ꟷ	ꟷ
Mount Murray moraine
MM-16-31-M	-76.1911	161.967	175.687	ꟷ	Granodiorite	Boulder	2.25	2.65	0.988027	28.9079	2.12628e-14	26.7514	9269.57	3463.27	1480	730	740	LSDn
MM-16-32-M	-76.1911	161.967	174.607	ꟷ	Granodiorite	Boulder	3.07143	2.65	0.988027	31.8264	1.15802e-14	51.3717	3296.85	3276.35	530	570	580	LSDn
MM-16-34-M	-76.1911	161.968	175.62	ꟷ	Granodiorite	Boulder	1.55556	2.65	0.993164	21.0691	1.23625e-14	50.2628	5608.24	5154.09	880	1030	1030	LSDn
Supplemental Table 1. Sample details for Mawson Glacier. Italic text denotes samples that were identified as likely outliers.

## Sheet: G48347
Jones, R.S., et al., 2020, Regional-scale abrupt Mid-Holocene ice sheet thinning in the western Ross Sea, Antarctica: Geology, v. 49, https://doi.org/10.1130/G48347.1
